# Supplementary material
Source: Springer Nature journal article supplement (https://www.springermedizin.de/resource/supplementary/12903_2014_407_MOESM2_ESM.pdf/9516990)

**A**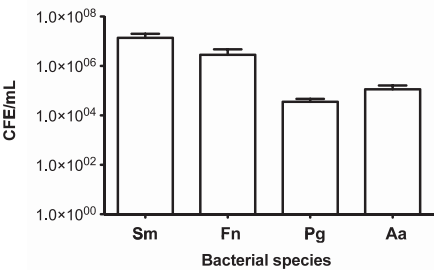**B**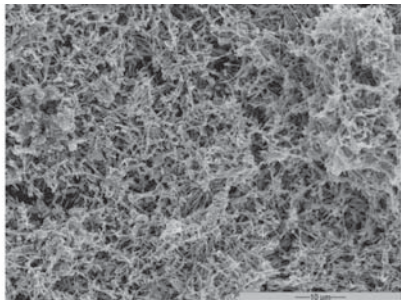**C**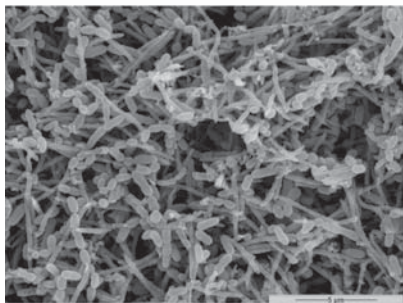**D**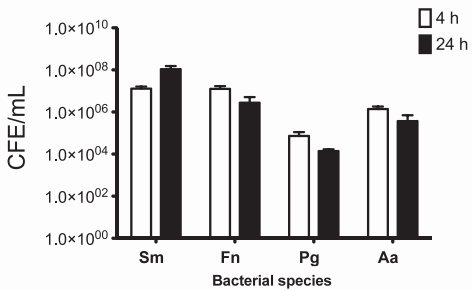

Supplement: MOESM2 [file 9516990]
